# Supplementary material
Source: Elsevier journal article supplement (https://www.sciencedirect.com/science/article/pii/S2173510721000148)
Supplement: mmc1 [file S2173510721000148:mmc1.doc]

**Material suplementario**

**Referencias bibliográficas tabla 1**

1. Bai HX, Hsieh B, Xiong Z, Halsey K, Choi JW, Tran TML, et al. Performance of Radiologists in Differentiating COVID-19 from Non-COVID-19 Viral Pneumonia at Chest CT. Radiology. 2020;296:E46-E54. doi: 10.1148/radiol.2020200823

2. Bernheim A, Mei X, Huang M, Yang Y, Fayad ZA, Zhang N, et al. Chest CT Findings in Coronavirus Disease-19 (COVID-19): Relationship to Duration of Infection. Radiology. 2020;295:200463. doi: 10.1148/radiol.2020200463

3.Cheng Z, Lu Y, Cao Q, Qin L, Pan Z, Yan F, et al. Clinical Features and Chest CT Manifestations of Coronavirus Disease 2019 (COVID-19) in a Single-Center Study in Shanghai, China. AJR Am J Roentgenol. 2020;215:121-6. doi: 10.2214/AJR.20.22959

4. Chung M, Bernheim A, Mei X, Zhang N, Huang M, Zeng X, et al. CT Imaging Features of 2019 Novel Coronavirus (2019-nCoV). Radiology. 2020;295:202-7. doi: 10.1148/radiol.2020200230

5. Franquet T, Jeong YJ, Lam HYS, Wong HYF, Chang YC, Chung MJ, et al. Imaging findings in coronavirus infections: SARS-CoV, MERS-CoV, and SARS-CoV-2. Br J Radiol. 2020;93(1112):20200515. doi: 10.1259/bjr.20200515

6. Fu F, Lou J, Xi D, Bai Y, Ma G, Zhao B, et al. Chest computed tomography findings of coronavirus disease 2019 (COVID-19) pneumonia. Eur Radiol. 2020;30:5489-98. doi: 10.1007/s00330-020-06920-8

7. Goyal N, Chung M, Bernheim A, Keir G, Mei X, Huang M, et al. Computed Tomography Features of Coronavirus Disease 2019 (COVID-19): A Review for Radiologists. J Thorac Imaging. 2020;35:211-8. doi: 10.1097/RTI.0000000000000527

8. Han R, Huang L, Jiang H, Dong J, Peng H, Zhang D. Early Clinical and CT Manifestations of Coronavirus Disease 2019 (COVID-19) Pneumonia. AJR Am J Roentgenol. 2020;215: 338-43. doi: 10.2214/AJR.20.22961

9. Li Y, Xia L. Coronavirus Disease 2019 (COVID-19): Role of Chest CT in Diagnosis and Management. AJR Am J Roentgenol. 2020;214:1280-6. doi: 10.2214/AJR.20.22954

10. Liang T, Liu Z, Wu CC, Jin C, Zhao H, Wang Y, et al. Evolution of CT findings in patients with mild COVID-19 pneumonia. Eur Radiol. 2020;30:4865-73. doi: 10.1007/s00330-020-06823-8

11. Liu M, Zeng W, Wen Y, Zheng Y, Lv F, Xiao K. COVID-19 pneumonia: CT findings of 122 patients and differentiation from influenza pneumonia. Eur Radiol. 2020;30:5463-9. doi: 10.1007/s00330-020-06928-0

12. Ojha V, Mani A, Pandey NN, Sharma S, Kumar S. CT in coronavirus disease 2019 (COVID-19): a systematic review of chest CT findings in 4410 adult patients. Eur Radiol. 2020;30:6129-38. doi: 10.1007/s00330-020-06975-7

13. Salehi S, Abedi A, Balakrishnan S, Gholamrezanezhad A. Coronavirus Disease 2019 (COVID-19): A Systematic Review of Imaging Findings in 919 Patients. AJR Am J Roentgenol. 2020;215:87-93. doi: 10.2214/AJR.20.23034

14. Song F, Shi N, Shan F, Zhang Z, Shen J, Lu H, et al. Emerging 2019 Novel Coronavirus (2019-nCoV) Pneumonia. Radiology. 2020;295:210-7. doi: 10.1148/radiol.2020200274

15. Wang Y, Dong C, Hu Y, Li C, Ren Q, Zhang X, et al. Temporal Changes of CT Findings in 90 Patients with COVID-19 Pneumonia: A Longitudinal Study. Radiology. 2020;296:E55-64. doi: 10.1148/radiol.2020200843

16. Wang H, Wei R, Rao G, Zhu J, Song B. Characteristic CT findings distinguishing 2019 novel coronavirus disease (COVID-19) from influenza pneumonia. Eur Radiol. 2020;30:4910-7. doi: 10.1007/s00330-020-06880-z

17. Ye Z, Zhang Y, Wang Y, Huang Z, Song B. Chest CT manifestations of new coronavirus disease 2019 (COVID-19): a pictorial review. Eur Radiol. 2020;30:4381-9. doi: 10.1007/s00330-020-06801-0

18. Yin Z, Kang Z, Yang D, Ding S, Luo H, Xiao E. A Comparison of Clinical and Chest CT Findings in Patients With Influenza A (H1N1) Virus Infection and Coronavirus Disease (COVID-19). AJR Am J Roentgenol. 2020;215:1065-71. doi: 10.2214/AJR.20.23214

19. Zhang R, Ouyang H, Fu L, Wang S, Han J, Huang K, et al. CT features of SARS-CoV-2 pneumonia according to clinical presentation: a retrospective analysis of 120 consecutive patients from Wuhan city. Eur Radiol. 2020;30:4417-26. doi: 10.1007/s00330-020-06854-1

20. Zhao W, Zhong Z, Xie X, Yu Q, Liu J. Relation Between Chest CT Findings and Clinical Conditions of Coronavirus Disease (COVID-19) Pneumonia: A Multicenter Study. AJR Am J Roentgenol. 2020;214:1072-7. doi: 10.2214/AJR.20.22976

21. Zhao X, Liu B, Yu Y, Wang X, Du Y, Gu J, et al. The characteristics and clinical value of chest CT images of novel coronavirus pneumonia. Clin Radiol. 2020;75:335-40. doi: 10.1016/j.crad.2020.03.002

22. Zhou S, Wang Y, Zhu T, Xia L. CT Features of Coronavirus Disease 2019 (COVID-19) Pneumonia in 62 Patients in Wuhan, China. AJR Am J Roentgenol. 2020;214:1287-94. doi: 10.2214/AJR.20.22975

**REFERENCIAS BIBLIOGRÁFICAS TABLA 2**

1. Parekh M, Donuru A, Balasubramanya R, Kapur S. Review of the Chest CT Differential Diagnosis of Ground-Glass Opacities in the COVID Era. Radiology. 2020 Jul 7:202504. doi: 10.1148/radiol.2020202504

2. Franquet T. Imaging of Community-acquired Pneumonia. J Thorac Imaging. 2018;33:282-94. doi: 10.1097/RTI.0000000000000347

3. Nambu A, Ozawa K, Kobayashi N, Tago M. Imaging of community-acquired pneumonia: Roles of imaging examinations, imaging diagnosis of specific pathogens and discrimination from noninfectious diseases. World J Radiol. 2014;6:779-93. doi: 10.4329/wjr.v6.i10.779

4. Guan WJ, Ni ZY, Hu Y, Liang WH, Ou CQ, He JX, et al. Clinical Characteristics of Coronavirus Disease 2019 in China. N Engl J Med. 2020;382:1708-20. doi: 10.1056/NEJMoa2002032

5. Musher DM, Thorner AR. Community-acquired pneumonia. N Engl J Med. 2014;371:1619-28. doi: 10.1056/NEJMra1312885

6. Mandell LA, Niederman MS. Aspiration Pneumonia. N Engl J Med. 2019;380:651-63. doi: 10.1056/NEJMra1714562

7. Hu X, Lee JS, Pianosi PT, Ryu JH. Aspiration-related pulmonary syndromes. Chest. 2015;147:815-23. doi: 10.1378/chest.14-1049

8. Nachiappan AC, Rahbar K, Shi X, Guy ES, Mortani Barbosa EJ Jr, Shroff GS, et al. Pulmonary Tuberculosis: Role of Radiology in Diagnosis and Management. Radiographics. 2017;37:52-72. doi:10.1148/rg.2017160032

9. Cereser L, Dallorto A, Candoni A, Volpetti S, Righi E, Zuiani C, et al. Pneumocystis jirovecii pneumonia at chest High-resolution Computed Tomography (HRCT) in non-HIV immunocompromised patients: Spectrum of findings and mimickers. Eur J Radiol. 2019;116:116-27. doi: 10.1016/j.ejrad.2019.04.025

10. Kanne JP, Yandow DR, Meyer CA. Pneumocystis jirovecii pneumonia: high-resolution CT findings in patients with and without HIV infection. AJR Am J Roentgenol. 2012;198:W555-61. doi: 10.2214/AJR.11.7329

11. Orlowski HLP, McWilliams S, Mellnick VM, Bhalla S, Lubner MG, Pickhardt PJ, et al. Imaging Spectrum of Invasive Fungal and Fungal-like Infections. Radiographics. 2017;37:1119-34. doi: 10.1148/rg.2017160110

12. Stanzani M, Sassi C, Lewis RE, Tolomelli G, Bazzocchi A, Cavo M, et al. High resolution computed tomography angiography improves the radiographic diagnosis of invasive mold disease in patients with hematological malignancies. Clin Infect Dis. 2015;60:1603-10. doi: 10.1093/cid/civ154

13. Thomas R, Madan R, Gooptu M, Hatabu H, Hammer MM. Significance of the Reverse Halo Sign in Immunocompromised Patients. AJR Am J Roentgenol. 2019;213:549-54. doi: 10.2214/AJR.19.21273

14. Ye R, Zhao L, Wang C, Wu X, Yan H. Clinical characteristics of septic pulmonary embolism in adults: a systematic review. Respir Med. 2014;108(1):1-8. doi: 10.1016/j.rmed.2013.10.012

15. Almeida RR, Marchiori E, Flores EJ. Frequency and Reliability of the Reversed Halo Sign in Patients With Septic Pulmonary Embolism Due to IV Substance Use Disorder. AJR Am J Roentgenol. 2020;214:59-67. doi: 10.2214/AJR.19.21659

16. Rossi SE, Goodman PC, Franquet T. Nonthrombotic pulmonary emboli. AJR Am J Roentgenol. 2000;174:1499-508. doi: 10.2214/ajr.174.6.1741499

17. Franquet T. Imaging of pulmonary viral pneumonia. Radiology. 2011;260:18-39. doi: 10.1148/radiol.11092149

18. Travis WD, Costabel U, Hansell DM, King TE Jr, Lynch DA, Nicholson AG, et al. An official American Thoracic Society/European Respiratory Society statement: Update of the international multidisciplinary classification of the idiopathic interstitial pneumonias. Am J Respir Crit Care Med. 2013;188:733-48. doi: 10.1164/rccm.201308-1483ST

19. Lee JW, Lee KS, Lee HY, Chung MP, Yi CA, Kim TS, et al. Cryptogenic organizing pneumonia: serial high-resolution CT findings in 22 patients. AJR Am J Roentgenol. 2010;195:916-22. doi: 10.2214/AJR.09.3940

20. Kligerman SJ, Groshong S, Brown KK, Lynch DA. Nonspecific interstitial pneumonia: radiologic, clinical, and pathologic considerations. Radiographics. 2009;29:73-87. doi: 10.1148/rg.291085096

21. Collard HR, Ryerson CJ, Corte TJ, Jenkins G, Kondoh Y, Lederer DJ, et al. Acute Exacerbation of Idiopathic Pulmonary Fibrosis. An International Working Group Report. Am J Respir Crit Care Med. 2016;194:265-75. doi: 10.1164/rccm.201604-0801CI

22. Magee AL, Montner SM, Husain A, Adegunsoye A, Vij R, Chung JH. Imaging of Hypersensitivity Pneumonitis. Radiol Clin North Am. 2016;54:1033-46. doi:10.1016/j.rcl.2016.05.013

23. Barnett J, Molyneaux PL, Rawal B, Abdullah R, Hare SS, Vancheeswaran R, et al. Variable utility of mosaic attenuation to distinguish fibrotic hypersensitivity pneumonitis from idiopathic pulmonary fibrosis. Eur Respir J. 2019;54:1900531. doi: 10.1183/13993003.00531-2019

24. Chong BJ, Kanne JP, Chung JH. Headcheese sign. J Thorac Imaging. 2014;29:W13. doi: 10.1097/RTI.0000000000000067

25. Ryu JH, Myers JL, Capizzi SA, Douglas WW, Vassallo R, Decker PA. Desquamative interstitial pneumonia and respiratory bronchiolitis-associated interstitial lung disease. Chest. 2005;127:178-84. doi: 10.1378/chest.127.1.178

26. Criado E, Sánchez M, Ramírez J, Arguis P, de Caralt TM, Perea RJ, et al. Pulmonary sarcoidosis: typical and atypical manifestations at high-resolution CT with pathologic correlation. Radiographics. 2010;30:1567-86. doi: 10.1148/rg.306105512

27. Jeong YJ, Kim KI, Seo IJ, Lee CH, Lee KN, Kim KN, et al. Eosinophilic lung diseases: a clinical, radiologic, and pathologic overview. Radiographics. 2007;27:617-39. doi: 10.1148/rg.273065051

28. Rossi SE, Erasmus JJ, McAdams HP, Sporn TA, Goodman PC. Pulmonary drug toxicity: radiologic and pathologic manifestations. Radiographics. 2000;20:1245-59. doi: 10.1148/radiographics.20.5.g00se081245

29. Wang CS, FitzGerald JM, Schulzer M, Mak E, Ayas NT. Does this dyspneic patient in the emergency department have congestive heart failure? JAMA. 2005;294:1944-56. doi:10.1001/jama.294.15.1944

30. Ponikowski P, Voors AA, Anker SD, Bueno H, Cleland JG, Coats AJ, et al. 2016 ESC Guidelines for the diagnosis and treatment of acute and chronic heart failure: The Task Force for the diagnosis and treatment of acute and chronic heart failure of the European Society of Cardiology (ESC) Developed with the special contribution of the Heart Failure Association (HFA) of the ESC. Eur Heart J. 2016;37:2129-200. doi: 10.1093/eurheartj/ehw128

31. Levesque MH, Montesi SB, Sharma A. Diffuse Parenchymal Abnormalities in Acutely Dyspneic Patients: A Pattern-based Approach. J Thorac Imaging. 2015;30:220-32. doi: 10.1097/RTI.0000000000000133

32. Fan E, Brodie D, Slutsky AS. Acute Respiratory Distress Syndrome: Advances in Diagnosis and Treatment. JAMA. 2018;319:698-710. doi: 10.1001/jama.2017.21907

33. ARDS Definition Task Force, Ranieri VM, Rubenfeld GD, et al. Acute respiratory distress syndrome: the Berlin Definition. JAMA. 2012;307(23):2526-33. doi: 10.1001/jama.2012.5669

34. Obadina ET, Torrealba JM, Kanne JP. Acute pulmonary injury: high-resolution CT and histopathological spectrum. Br J Radiol. 2013;86:20120614. [doi](file:///C:\Users\Juan\Desktop\doi): 10.1259/bjr.20120614

35. Lara AR, Schwarz MI. Diffuse alveolar hemorrhage. Chest. 2010;137:1164-71. doi: 10.1378/chest.08-2084

36. Marchiori E, Menna Barreto M, Pereira Freitas HM, Hochhegger B, Soares Souza A Jr, Zanetti G, et al. Morphological characteristics of the reversed halo sign that may strongly suggest pulmonary infarction. Clin Radiol. 2018;73:503.e7-13. doi: 10.1016/j.crad.2017.11.022

37. Revel MP, Triki R, Chatellier G, Couchon S, Haddad N, Hernigou A, et al. Is It possible to recognize pulmonary infarction on multisection CT images? Radiology. 2007;244:875-82. doi: 10.1148/radiol.2443060846

38. Benveniste MF, Gomez D, Carter BW, Betancourt Cuellar SL, Shroff GS, Benveniste APA, et al. Recognizing Radiation Therapy-related Complications in the Chest. Radiographics. 2019;39:344-66. doi: 10.1148/rg.2019180061

39. Betancourt SL, Martinez-Jimenez S, Rossi SE, Truong MT, Carrillo J, Erasmus JJ. Lipoid pneumonia: spectrum of clinical and radiologic manifestations. AJR Am J Roentgenol. 2010;194:103-9. doi: 10.2214/AJR.09.3040

40. Henry TS, Kligerman SJ, Raptis CA, Mann H, Sechrist JW, Kanne JP. Imaging Findings of Vaping-Associated Lung Injury. AJR Am J Roentgenol. 2020;214:498-505. doi: 10.2214/AJR.19.22251

41. Gorguner M, Akgun M. Acute inhalation injury. Eurasian J Med. 2010;42:28-35. doi: 10.5152/eajm.2010.09

42. Holbert JM, Costello P, Li W, Hoffman RM, Rogers RM. CT features of pulmonary alveolar proteinosis. AJR Am J Roentgenol. 2001;176:1287-94. doi: 10.2214/ajr.176.5.1761287
